# Supplementary material for: Psychosoziale Auswirkungen der Pandemie auf Pflegekräfte und Bewohner von Pflegeheimen sowie deren Angehörige – Ein systematisches Review
Source: Springer Nature journal article supplement (doi:10.1007/s00391-021-01859-x), 2021-02-23
Supplement: MOESM1 [file 18894950]

Supplement 1  
Datenbankrecherchen

**Suchstrategie in MEDLINE via Pubmed**

|    | Suchbegriffe                                                                                                                                                                                                                                                                                           | Anzahl der Treffer |
|----|--------------------------------------------------------------------------------------------------------------------------------------------------------------------------------------------------------------------------------------------------------------------------------------------------------|--------------------|
| #1 | (nursing homes[MeSH Terms]) OR (nursing home[MeSH Terms])                                                                                                                                                                                                                                              | 667                |
| #2 | "skilled nursing"[Text Word]                                                                                                                                                                                                                                                                           | 457                |
| #3 | "nursing home"[Text Word] OR "nursing homes"[Text Word]                                                                                                                                                                                                                                                | 2.138              |
| #4 | "longterm care"[Text Word]                                                                                                                                                                                                                                                                             | 5                  |
| #5 | "long-term care"[Text Word] OR "long term care"[Text Word]                                                                                                                                                                                                                                             | 1.770              |
| #6 | "elderly home"[Text Word]                                                                                                                                                                                                                                                                              | 6                  |
| #7 | #1 OR #2 OR #3 OR #4 OR #5 OR #6                                                                                                                                                                                                                                                                       | 3.794              |
| #8 | ("severe acute respiratory syndrome coronavirus 2"[Supplementary Concept] OR "severe acute respiratory syndrome coronavirus 2"[All Fields] OR "ncov"[All Fields] OR "2019 ncov"[All Fields] OR "covid 19"[All Fields] OR "sars cov 2"[All Fields] OR ("coronavirus"[All Fields] OR "cov"[All Fields])) | 77.709             |
| #9 | #6 AND #7 Filters: German, English                                                                                                                                                                                                                                                                     | 636                |

Einschränkung: publication date 01/01/2020 – 25/11/2020t, Publikation in Deutsch oder Englisch

**Suchstrategie in CINAHL via EBSCOhost**

|    | Suchbegriffe                                                                                                                                             | Anzahl der Treffer |
|----|----------------------------------------------------------------------------------------------------------------------------------------------------------|--------------------|
| #1 | TX ( long-term care or nursing home or residential care or assisted living ) OR TX ( skilled nursing facility or nursing home or snf or long term care ) | 4.906              |
| #2 | TX covid-19 or coronavirus or 2019-ncov or sars-cov-2 or cov-19                                                                                          | 3.198              |
| #3 | #1 AND #2                                                                                                                                                | 181                |

Einschränkung: peer-reviewed, human, publication date 01/01/2020 – 30/11/2020, English or German
